# Supplementary material for: Synthesis of amphiphilic diblock copolymers of isotactic polystyrene-block-isotactic poly(p-hydroxystyrene) using a titanium complex with an [OSSO]-type bis(phenolate) ligand and sequential monomer addition
Source: Royal Society of Chemistry journal article supplement (doi:10.1039/c7ra01450c), 2017-01-01
Supplement: c7ra01450c1.pdf [file c7ra01450c1.pdf]

## Synthesis of Amphiphilic Diblock Copolymer of Isotactic Polystyrene-*block*-Isotactic Poly(*p*-hydroxystyrene) Using Titanium Complex with [OSSO]-Type Bis(phenolate) Ligand and Sequential Monomer Addition

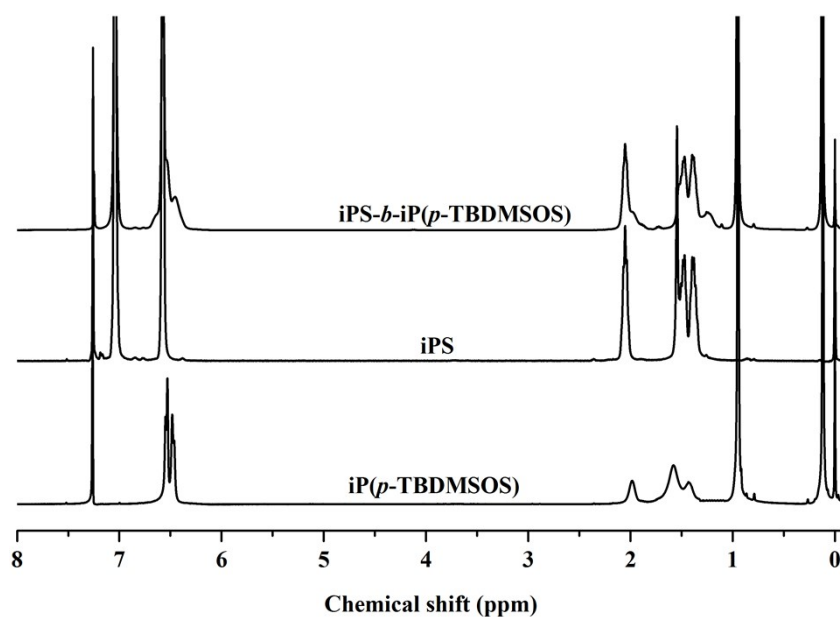

**Figure S1.** <sup>1</sup>H NMR spectra of *iPS-b-iP(p-TBDMSOS)* (Table 2, Run 2), *iPS* and *iP(p-TBDMSOS)* in CDCl<sub>3</sub> at 25 °C.

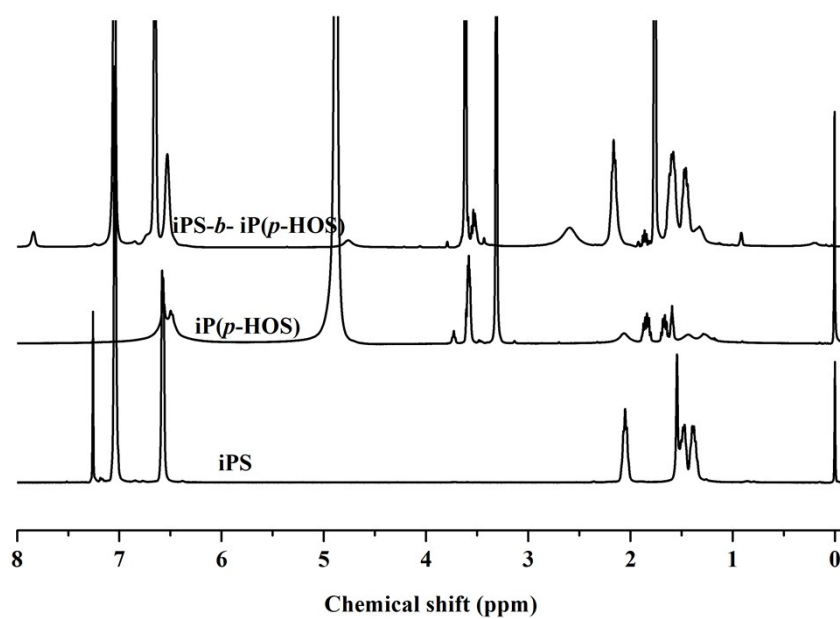

**Figure S2.**  $^1\text{H}$  NMR spectra of *iPS-b-iP(p-HOS)* (Table 2, Run 2), *iPS* and *iP(p-HOS)* in  $\text{THF-}d_8$ ,  $\text{CDCl}_3$  and  $\text{CD}_3\text{OD}$  at  $25\text{ }^\circ\text{C}$

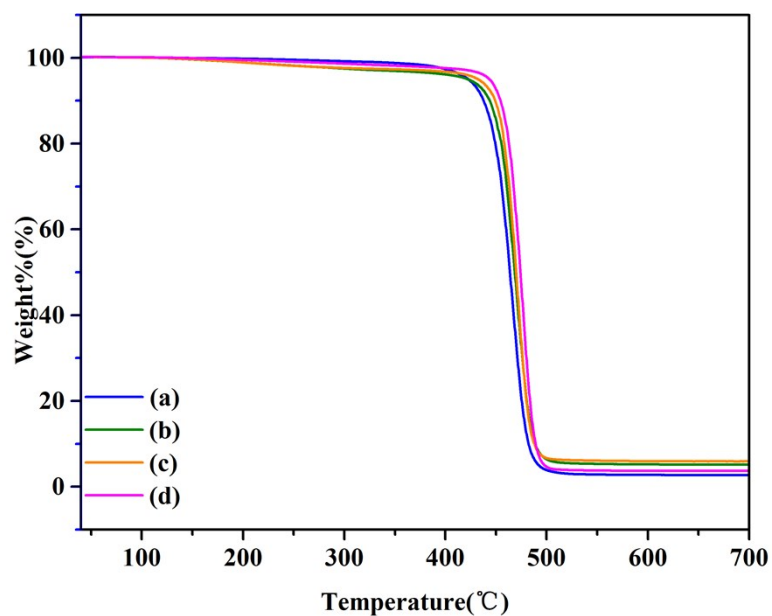

**Figure S3.** TGA traces (a:  $M_n=3.08\text{ g mol}^{-1}$ ; b:  $M_n=4.84\text{ g mol}^{-1}$ ; c:  $M_n=6.43\text{ g mol}^{-1}$ ; d:  $M_n=6.96\text{ g mol}^{-1}$ ) of *iP(p-TBDMSOS)*

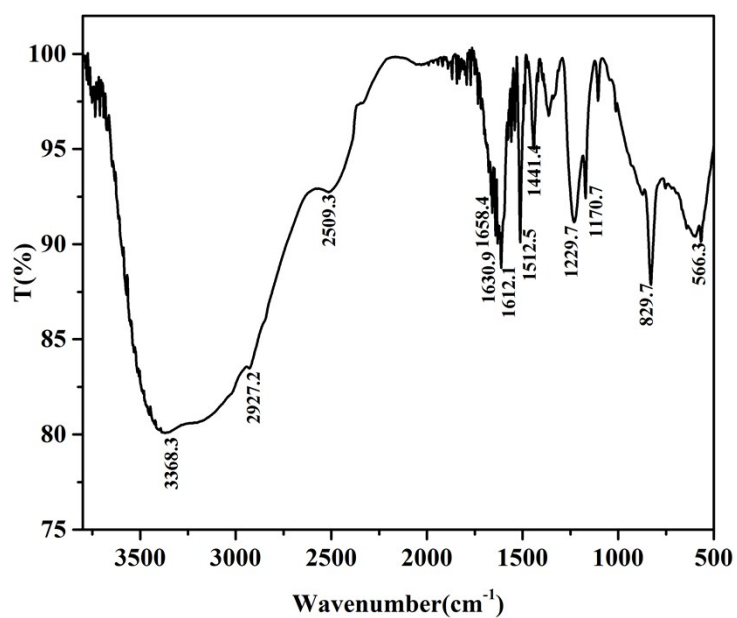

**Figure S4.** IR spectrum of *iP(p-HOS)* sample obtained from hydrolysis of *iP(p-TBDMSOS)*
